# Supplementary material
Source: Springer Nature journal article supplement (https://www.springermedizin.de/resource/supplementary/12913_2014_3456_MOESM1_ESM.pdf/9532876)

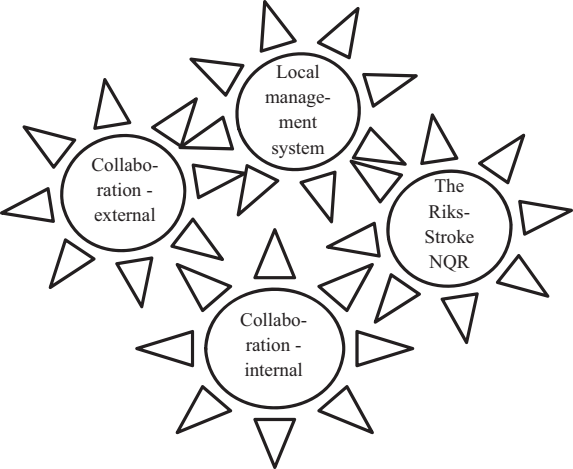

Supplement: MOESM1 [file 9532876]
